# Supplementary material for: Differentiation of Human Bone Marrow-Derived Mesenchymal Stem Cells into Insulin-Producing Cells: Evidence for Further Maturation In Vivo
Source: PubMed Central journal article supplement (PMC4443784; doi:10.1155/2015/575837), 2015-05-12
Supplement: 575837.f1.pdf [file 575837.f1.pdf]

**Supplementary figure 1.**

Multilineage differentiation of HBM-MSCs.

(A) Adipogenesis was detected using oil-Red-O staining.

(B) Chondrogenesis was detected using alcian blue staining.

(C) Osteogenesis was detected using alizarin-red staining

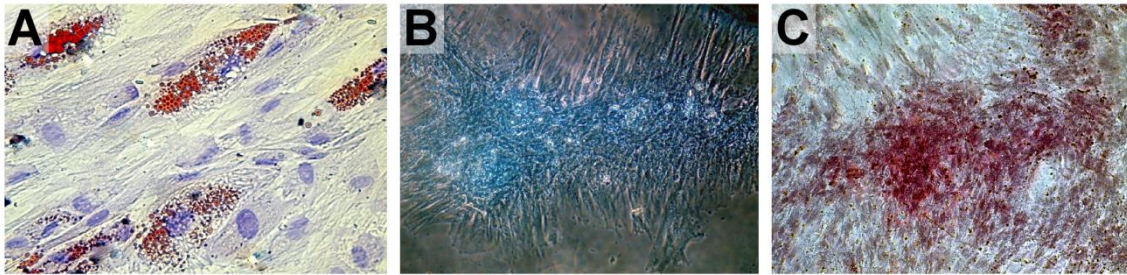

**Supplementary Table 1.** Flow cytometric quantitation of surface markers of the undifferentiated MSCs

| <b>Donor</b>   | <b>CD 14</b>   | <b>CD 34</b>   | <b>CD 45</b>   | <b>CD 73</b> | <b>CD 90</b>  | <b>CD 105</b> |
|----------------|----------------|----------------|----------------|--------------|---------------|---------------|
| 1              | 1.7            | 1.2            | 0.05           | 99.95        | 98.05         | 99.9          |
| 2              | 2.6            | 0.2            | 0.1            | 99.5         | 99.4          | 96.4          |
| 3              | 1.9            | 1.4            | 0.1            | 92           | 99.6          | 94            |
| 4              | 1.3            | 2.2            | 0.3            | 92           | 98.4          | 93            |
| 5              | 2.2            | 1.5            | 0.2            | 91.2         | 99.5          | 97.4          |
| 6              | 1.9            | 2.2            | 0.1            | 99.9         | 99.5          | 97.7          |
| <b>Mean±SD</b> | <b>1.9±0.5</b> | <b>1.3±0.7</b> | <b>0.2±0.1</b> | <b>96±4</b>  | <b>99±0.7</b> | <b>96±2.5</b> |

**Supplementary Table 2: Oral glucose tolerance test (1gm/Kg) of transplanted nude mice (2, 4, and 12 weeks after transplantation)**

|                | Zero min            |                   | 30 min              |                  | 60 min              |                  | 90 min              |                  | 120 min             |                    |
|----------------|---------------------|-------------------|---------------------|------------------|---------------------|------------------|---------------------|------------------|---------------------|--------------------|
|                | Blood Glucose mg/dl | C-peptide ng/ml   | Blood Glucose mg/dl | C-peptide ng/ml  | Blood Glucose mg/dl | C-peptide ng/ml  | Blood Glucose mg/dl | C-peptide ng/ml  | Blood Glucose mg/dl | C-peptide ng/ml    |
| 2 weeks        | 196                 | 0.3               | 277                 | 0.7              | 189                 | 0.4              | 63                  | 0.2              | 77                  | 0.3                |
|                | 133                 | 0.2               | 385                 | 0.9              | 325                 | 0.7              | 260                 | 0.4              | 190                 | 0.3                |
| <b>Mean±SD</b> | <b>164.5±44.55</b>  | <b>0.25±0.071</b> | <b>331±76.37</b>    | <b>0.8±0.14</b>  | <b>257±96.17</b>    | <b>0.55±0.21</b> | <b>161.5±139.3</b>  | <b>0.3±0.14</b>  | <b>133.5±79.9</b>   | <b>0.3±0</b>       |
| 4 weeks        | 162                 | 0.18              | 200                 | 0.5              | 101                 | 0.4              | 79                  | 0.2              | 55                  | 0.09               |
|                | 131                 | 0.3               | 291                 | 0.8              | 252                 | 0.6              | 189                 | 0.5              | 101                 | 0.2                |
| <b>Mean±SD</b> | <b>146.5±21.9</b>   | <b>0.24±0.085</b> | <b>245.5±64.3</b>   | <b>0.65±0.21</b> | <b>176.5±106.8</b>  | <b>0.5±0.14</b>  | <b>134±77.8</b>     | <b>0.35±0.21</b> | <b>78±32.5</b>      | <b>0.145±0.078</b> |
| 12 weeks       | 83                  | 0.3               | 167                 | 0.4              | 121                 | 0.3              | 45                  | 0.1              | 45                  | 0.1                |
|                | 106                 | 0.4               | 176                 | 0.4              | 180                 | 0.5              | 131                 | 0.4              | 86                  | 0.2                |
| <b>Mean±SD</b> | <b>94.5±16.26</b>   | <b>0.35±0.07</b>  | <b>171.5±6.36</b>   | <b>0.4±0.0</b>   | <b>150.5±41.71</b>  | <b>0.4±0.141</b> | <b>88±60.8</b>      | <b>0.25±0.21</b> | <b>65.5±29.0</b>    | <b>0.15±0.07</b>   |

**Supplementary Table 3: Percentage of in vitro and in vivo insulin-positive cells**

|                                      | <b>In vitro</b>  | <b>1 week after transplantation</b> | <b>2 weeks after transplantation</b> | <b>4 weeks after transplantation</b> | <b>12 weeks after transplantation</b> |
|--------------------------------------|------------------|-------------------------------------|--------------------------------------|--------------------------------------|---------------------------------------|
| Percentage of insulin positive cells | 2                | 8.9                                 | 16.4                                 | 15.2                                 | 14.1                                  |
|                                      | 3.4              | 14.6                                | 15.7                                 | 15.7                                 | 18.6                                  |
|                                      | 2.2              | 14.3                                | 22.8                                 | 19.8                                 | 16.6                                  |
|                                      | 1.47             | 12.9                                | 17                                   | 16.6                                 | 16.5                                  |
|                                      | 2.6              | 10                                  | 20.4                                 | 24                                   | 17.5                                  |
|                                      | 3                | 13                                  | 13.2                                 | 16.96                                | 20                                    |
| <b>Mean±SD</b>                       | <b>2.44±0.70</b> | <b>12.28±2.32</b>                   | <b>17.58±3.45</b>                    | <b>18.04±3.33</b>                    | <b>17.22±2.02</b>                     |
| <b>P-Value</b>                       | <b>&lt;0.001</b> | <b>0.026</b>                        | <b>0.694</b>                         | <b>0.605</b>                         |                                       |

**Supplementary Table 4: Relative gene expression ( Human islets as a control )**

|                              | <b>INS</b> | <b>GCG</b> | <b>PDX1</b> | <b>SST</b> | <b>NGN3</b> | <b>PAX4</b> | <b>GCK</b> | <b>RFX6</b> | <b>GLUT2</b> | <b>Neurod1</b> | <b>NES</b> | <b>MafA</b> | <b>MafB</b> | <b>OCT4</b> |
|------------------------------|------------|------------|-------------|------------|-------------|-------------|------------|-------------|--------------|----------------|------------|-------------|-------------|-------------|
| <b>Undiff. MSCs</b>          | 0.00000    | 0.00003    | 0.00001     | 0.00010    | 0.01866     | 0.00876     | 0.00018    | 0.04859     | 0.00362      | 0.05892        | 0.00212    | 0.00128     | 0.00682     | 0.00045     |
|                              | 0.00000    | 0.00020    | 0.00014     | 0.00010    | 0.00007     | 0.00012     | 0.00030    | 0.00022     | 0.00028      | 0.00057        | 0.00017    | 0.00082     | 0.00088     | 0.00012     |
|                              | 0.00000    | 0.00024    | 0.00012     | 0.00026    | 0.00020     | 0.00003     | 0.00009    | 0.00017     | 0.00006      | 0.00098        | 0.00138    | 0.00020     | 0.09251     | 0.00007     |
|                              | 0.00000    | 0.00024    | 0.00012     | 0.00026    | 0.00020     | 0.00003     | 0.00009    | 0.00017     | 0.00006      | 0.00098        | 0.00138    | 0.00020     | 0.09251     | 0.00007     |
|                              | 0.00000    | 0.00024    | 0.00013     | 0.00026    | 0.00020     | 0.00003     | 0.00009    | 0.00017     | 0.00006      | 0.00098        | 0.00138    | 0.00020     | 0.09251     | 0.00007     |
|                              | 0.00000    | 0.00006    | 0.00004     | 0.00007    | 0.00007     | 0.00007     | 0.00007    | 0.00001     | 0.00050      | 0.00001        | 0.00012    | 0.10162     | 0.00010     | 0.01949     |
| <b>Median</b>                | 0          | 0.00022    | 0.00012     | 0.00018    | 0.0002      | 0.00005     | 0.0009     | 0.00019     | 0.00006      | 0.00098        | 0.00138    | 0.0002      | 0.056       | 0.00007     |
|                              |            |            |             |            |             |             |            |             |              |                |            |             |             |             |
| <b>End of In vitro Diff.</b> | 0.00145    | 0.00035    | 0.00043     | 0.00036    | 0.00138     | 0.00625     | 0.00019    | 0.00142     | 0.00018      | 0.00085        | 0.00229    | 0.00035     | 0.01095     | 0.00031     |
|                              | 0.00119    | 0.00129    | 0.00059     | 0.00027    | 0.00035     | 0.00008     | 0.00136    | 0.00140     | 0.00067      | 0.00848        | 0.00214    | 0.00030     | 0.01086     | 0.00014     |
|                              | 0.00142    | 0.00207    | 0.00134     | 0.00235    | 0.00202     | 0.00038     | 0.00026    | 0.00173     | 0.00108      | 0.00853        | 0.00452    | 0.00202     | 0.02456     | 0.00079     |
|                              | 0.00018    | 0.00041    | 0.00062     | 0.00043    | 0.00047     | 0.00015     | 0.00014    | 0.00073     | 0.00037      | 0.00201        | 0.00699    | 0.00060     | 0.04656     | 0.00022     |
|                              | 0.00073    | 0.00114    | 0.00072     | 0.00033    | 0.00145     | 0.00008     | 0.00052    | 0.00263     | 0.00041      | 0.00528        | 0.00134    | 0.00080     | 0.01564     | 0.00015     |
|                              | 0.00003    | 0.00010    | 0.00077     | 0.00005    | 0.00048     | 0.00014     | 0.00096    | 0.00141     | 0.00008      | 0.00125        | 0.00021    | 0.00176     | 0.05711     | 0.00049     |
| <b>Median</b>                | 0.00096    | 0.000775   | 0.00067     | 0.000345   | 0.00093     | 0.000145    | 0.00039    | 0.00141     | 0.00039      | 0.00364        | 0.00221    | 0.0007      | 0.0201      | 0.00026     |
|                              |            |            |             |            |             |             |            |             |              |                |            |             |             |             |
| <b>1 Week After Transpl.</b> | 0.01753    | 0.02166    | 0.10124     | 0.06044    | 0.07383     | 0.06595     | 0.00823    | 0.07506     | 0.02126      | 0.25753        | 0.13076    | 0.16053     | 0.03270     | 0.03120     |
|                              | 0.00983    | 0.01006    | 0.00405     | 0.00233    | 0.00270     | 0.00072     | 0.01208    | 0.01246     | 0.00461      | 0.01536        | 0.00342    | 0.00228     | 0.00813     | 0.00030     |
|                              | 0.00337    | 0.00358    | 0.00247     | 0.00159    | 0.00190     | 0.00029     | 0.00354    | 0.00293     | 0.00168      | 0.00821        | 0.00129    | 0.00080     | 0.00646     | 0.00045     |
|                              | 0.00272    | 0.00348    | 0.00251     | 0.00192    | 0.00235     | 0.00029     | 0.00252    | 0.00253     | 0.00120      | 0.02095        | 0.00223    | 0.00450     | 0.00263     | 0.00104     |
|                              | 0.00174    | 0.00130    | 0.00092     | 0.00302    | 0.00335     | 0.00095     | 0.00127    | 0.00680     | 0.00097      | 0.01460        | 0.00424    | 0.00156     | 0.00225     | 0.00019     |
|                              | 0.00150    | 0.00104    | 0.00532     | 0.00231    | 0.00324     | 0.00000     | 0.00125    | 0.00264     | 0.00120      | 0.01632        | 0.01064    | 0.00269     | 0.16885     | 0.00000     |
| <b>Median</b>                | 0.0030     | 0.0035     | 0.0032      | 0.00232    | 0.00297     | 0.0005      | 0.003      | 0.00486     | 0.00144      | 0.01584        | 0.00383    | 0.00248     | 0.00729     | 0.00037     |

|                                | INS     | GCG     | PDX1    | SST     | NGN3    | PAX4    | GCK     | RFX6    | GLUT2   | Neurod1 | NES     | MafA    | MafB    | OCT4    |
|--------------------------------|---------|---------|---------|---------|---------|---------|---------|---------|---------|---------|---------|---------|---------|---------|
| <b>2 Weeks After Transpl.</b>  | 0.00370 | 0.00750 | 0.01450 | 0.00740 | 0.04060 | 0.00890 | 0.00440 | 0.04710 | 0.01550 | 0.08600 | 0.02050 | 0.01900 | 0.66910 | 0.00390 |
|                                | 0.02769 | 0.02221 | 0.00597 | 0.00120 | 0.00147 | 0.00057 | 0.02683 | 0.03002 | 0.00892 | 0.01859 | 0.00111 | 0.00147 | 0.00155 | 0.00049 |
|                                | 0.00209 | 0.00180 | 0.00083 | 0.00317 | 0.00204 | 0.00158 | 0.00101 | 0.00180 | 0.00107 | 0.01195 | 0.00193 | 0.00156 | 0.03765 | 0.00025 |
|                                | 0.00068 | 0.00228 | 0.00349 | 0.00299 | 0.00619 | 0.00346 | 0.00267 | 0.00562 | 0.00289 | 0.01366 | 0.05188 | 0.03236 | 0.26840 | 0.00631 |
|                                | 0.00088 | 0.00285 | 0.00227 | 0.00440 | 0.00337 | 0.00252 | 0.00256 | 0.00611 | 0.00235 | 0.01580 | 0.02521 | 0.00335 | 0.13775 | 0.00179 |
|                                | 0.00182 | 0.00511 | 0.00459 | 0.00774 | 0.00410 | 0.00000 | 0.00000 | 0.00411 | 0.00185 | 0.07006 | 0.00440 | 0.00231 | 0.08500 | 0.00193 |
| <b>Median</b>                  | 0.0019  | 0.00398 | 0.004   | 0.0037  | 0.0037  | 0.002   | 0.0026  | 0.0058  | 0.0026  | 0.0171  | 0.012   | 0.0028  | 0.111   | 0.0018  |
|                                |         |         |         |         |         |         |         |         |         |         |         |         |         |         |
| <b>4 Weeks After Transpl.</b>  | 0.00457 | 0.01247 | 0.00462 | 0.04897 | 0.04234 | 0.00476 | 0.01019 | 0.01439 | 0.01226 | 0.00830 | 0.01109 | 0.01061 | 0.00638 | 0.00208 |
|                                | 0.00773 | 0.01668 | 0.00656 | 0.03263 | 0.01506 | 0.00384 | 0.00295 | 0.01082 | 0.00356 | 0.07379 | 0.00396 | 0.01183 | 0.00776 | 0.00293 |
|                                | 0.01515 | 0.01450 | 0.00571 | 0.00191 | 0.00403 | 0.00101 | 0.01613 | 0.01783 | 0.00511 | 0.02178 | 0.00198 | 0.00470 | 0.00533 | 0.00156 |
|                                | 0.01928 | 0.01977 | 0.00616 | 0.00292 | 0.00568 | 0.00126 | 0.02015 | 0.02631 | 0.00697 | 0.03151 | 0.00263 | 0.00362 | 0.00278 | 0.00160 |
|                                | 0.01729 | 0.01545 | 0.00790 | 0.00371 | 0.00724 | 0.00178 | 0.01908 | 0.02655 | 0.00670 | 0.02968 | 0.00501 | 0.01140 | 0.00719 | 0.00297 |
|                                | 0.01987 | 0.01907 | 0.00739 | 0.00303 | 0.00338 | 0.00078 | 0.01688 | 0.01738 | 0.00642 | 0.02172 | 0.00393 | 0.00397 | 0.01008 | 0.00098 |
| <b>Median</b>                  | 0.016   | 0.016   | 0.006   | 0.0033  | 0.0064  | 0.0015  | 0.0165  | 0.0176  | 0.0065  | 0.0257  | 0.0039  | 0.0076  | 0.0067  | 0.0018  |
|                                |         |         |         |         |         |         |         |         |         |         |         |         |         |         |
| <b>12 Weeks After Transpl.</b> | 0.0041  | 0.00222 | 0.00126 | 0.00148 | 0.00284 | 0.00362 | 0.00118 | 0.00881 | 0.00109 | 0.01188 | 0.00059 | 0.00513 | 0.25618 | 0.00048 |
|                                | 0.0090  | 0.00192 | 0.00347 | 0.00460 | 0.00431 | 0.00056 | 0.00186 | 0.02035 | 0.00226 | 0.00991 | 0.00365 | 0.04579 | 0.75626 | 0.00513 |
|                                | 0.0066  | 0.02418 | 0.02521 | 0.01884 | 0.02628 | 0.00556 | 0.01201 | 0.02352 | 0.01209 | 0.11908 | 0.01795 | 0.03467 | 0.01399 | 0.01136 |
|                                | 0.0048  | 0.00798 | 0.01278 | 0.01342 | 0.01924 | 0.00430 | 0.01278 | 0.00739 | 0.00549 | 0.12500 | 0.01379 | 0.01820 | 0.08077 | 0.00455 |
|                                | 0.0058  | 0.00635 | 0.00534 | 0.01024 | 0.01060 | 0.00609 | 0.01168 | 0.00534 | 0.00744 | 0.03103 | 0.00626 | 0.01038 | 0.03467 | 0.00288 |
|                                | 0.0059  | 0.03013 | 0.01959 | 0.00395 | 0.00000 | 0.00000 | 0.00394 | 0.00491 | 0.07214 | 0.01974 | 0.00377 | 0.00830 | 0.05253 | 0.00000 |
| <b>Median</b>                  | 0.00585 | 0.0071  | 0.009   | 0.007   | 0.007   | 0.0039  | 0.0078  | 0.0081  | 0.0064  | 0.0253  | 0.005   | 0.014   | 0.066   | 0.0037  |
